# Supplementary material for: OPA1 deletion in brown adipose tissue improves thermoregulation and systemic metabolism via FGF21
Source: eLife. 2021 May 4;10:e66519. doi: 10.7554/eLife.66519 (PMC8128440; doi:10.7554/eLife.66519)
Supplement: Figure 1—figure supplement 1—source data 1. [file elife-66519-fig1-figsupp1-data1.xlsx]

## Sheet: Sheet1
Figure 1- Supplemental Figure 1
A- iWAT immunoblot			B- Liver immunoblot			C- Muscle immunoblot
WT	KO		WT	KO		WT	KO
0.60255	0.663366		0.406417	0.352368		2.93365	2.53892
0.796781	0.965418		0.112613	0.417197		3.12707	1.72878
0.537383	1.2315		0.421203	1.30952		2.23077	3.55676
1.06169	0.667319		0.213964			3.9
	1.8764		0.232432			3.32335
	1.07563					3.22523
D- Body mass 4-week old females			E-% Fat mass 4-week old females			F-% Lean mass 4-week old females			G- VO2 7-week old female						H- %Fat mass 8 weeks			EI % Lean mass 8 wks			J- % Fat mass 20 wk			K- % Lean mass 20 wk
WT	KO		WT	KO		WT	KO		BM	WT	BM	KO			WT	KO		WT	KO		WT	KO		WT	KO
14.15	12.7		4.85	6.49		65.19	77.11		19.5	53.3827	17.3	52.3699			6.21	3.4		70.2	70.84		32.85	7.08		52.72	69.94
13.77	14.15		5.7	4.2		65.96	53.88		20.1	50.5941	17	50.7115			3.06	4.14		74.16	72.46		31.63	6.66		53.18	70.19
14.77	14.29		6.69	7.77		61.71	63.6		18	49.414	19	56.6896			0.41	3.39		76.26	72.19		32.2	6.82		51.82	69.51
13.45	12.32		6.09	4.72		64.32	61.42		15.9	41.3862	17.9	54.232			1.83	4.42		74.01	72.27		11.18	8.06		68.28	68.31
12.28	13.32		5.08	2.5		63.91	68.32		20	48.0099	17.9	57.3845			4.84	0.95		72.56	75.27		25.46	5.72		58.2	69.85
14.42			7.77			61.48										4.07			70.12		34.84			51.2
15.14			5.28			64.73										2.5			73.85		19.38			63.05
																5.27			69.55
L- GTT 8 wks																M- GTT AUC 8 wks
	WT						KO									WT	KO
0	102	101	130	134	134		123	168	177	155	152	190	169	158		25323	19588
5	218	190	284	191	273		188	245	352	307	363	313	271	223		17345	28748
15	293	246	336	321	326		181	348	400	281	376	208	231	280		27700	30395
30	296	153	282	240	275		169	320	337	260	366	181	226	255		23135	24503
60	186	124	200	167	192		127	216	206	182	232	168	199	173		26325	31848
120	158	119	190	148	168		203	174	182	142	179	190	161	163			22755
																	24213
																	23980
N- GTT 20 wks																O- GTT AUC 20 wks
	WT								KO							WT	KO
0	152	155	146	129	133	135	118		155	129	145	145	159			20280	25018
5	190	266	328	150	246	409	213		182	239	274	276	260			28313	20765
15	290	356	427	198	374	389	323		228	262	308	391	278			35230	29698
30	260	290	357	175	365	432	294		214	186	356	345	289			19425	30908
60	106	229	279	161	365	363	160		204	166	234	245	230			38750	28375
120	141	155	216	144	242	399	183		214	124	163	160	190			46293
																25235
P- Body mass 50 wks			Q- Fat mass 50 wks			R- Fat mass 50 wks
WT	KO		WT	KO		WT	KO
26.72	21.42		20.58	9.34		59.88	67.23
35.96	21.89		39.49	9.59		47.55	67.15
35.87	22.69		34.57	10.14		50.46	66.11
34.54	21.93		34.45	10.49		50.38	66.12
35.9	17.99		36.21	6.67		50.14	67.82
30.21	23.06		27.14	11.71		54.95	65.92
30.44			21.68			59.13
40.46			43.75			44.24
39.55			42.23			45.76
S- GTT 50 wks																T- GTT AUC 50 wks
	WT								KO							WT	KO
0	136	130	104	118	121	126	132		111	61	97	134	97	122		42158	27398
5	261	276	186	223	318	241	240		116	135	237	288	224	231		52098	17120
15	403	579	421	467	501	517	367		237	182	355	304	320	330		46555	48045
30	525	600	449	521	600	409	398		309	224	505	385	340	425		49963	34743
60	378	503	519	533	600	299	600		277	132	533	341	237	304		57640	31738
120	200	211	206	215	273	156	216		129	90	208	148	250	138		35923	33545
																49153
U- Food intake (30C)
	WT									KO
Light	0.0202326	0.0277907	0.0286047	0.0255814	0.0246512	0.0290698	0.0238372			0.0227907	0.0217442	0.03	0.0260465	0.0306977	0.0293023	0.0302326
Dark	0.0342683	0.0513415	0.0490244	0.042561	0.0562195	0.0297561	0.042561			0.0353658	0.0553658	0.0471951	0.0426829	0.0420732	0.0360975	0.0490244
V- Locomotor activity (30C)
	WT									KO
Light	286.395	240.686	372.326	296.651	287.105	329.93	115.244	382.977		395.43	306.581	438.953	537.93	323	234.709	381.337	433.744
Dark	1041.63	1152.59	1600.63	1596.41	1456.28	924.122	652.476	1260.02		1204.68	559.28	1558.21	1187.84	767.305	396.366	965.573	1238.39
