# Supplementary material for: OPA1 deletion in brown adipose tissue improves thermoregulation and systemic metabolism via FGF21
Source: eLife. 2021 May 4;10:e66519. doi: 10.7554/eLife.66519 (PMC8128440; doi:10.7554/eLife.66519)
Supplement: Figure 1—figure supplement 2—source data 1. [file elife-66519-fig1-figsupp2-data1.xlsx]

## Sheet: Sheet1
Figure 1-Supplemental Figure 2
A- Body mass			B- Fat mass			C- Lean mass
WT	KO		WT	KO		WT	KO
18.15	18.75		6.06	6.93		67.77	69.87
19.66	16.23		6.1	5.55		67.65	66.54
17.17	16.03		10.48	11.85		67.56	63.63
17.87	16.72		5.6	6.58		69.95	69.98
18.54	17.26		8.63	5.21		67.96	70.68
18.38	17.36		7.07	6.34		65.83	68.55
20.18	18.54		10.41	7.55		63.92	68.5
20.35			9.34			65.85
17.82			6.17			68.46
D- BAT mass			E- gWAT mass			F- iWAT mass
WT	KO		WT	KO		WT	KO
0.00361983	0.00588997		0.00991185	0.00960626		0.0147328	0.0124919
0.00374873	0.00455069		0.0112055	0.00859447		0.0134944	0.00949885
0.00306634	0.00455968		0.0152432	0.00807068		0.0170909	0.009073
0.00400892	0.00521873		0.0106046	0.00874923		0.0131962	0.0108732
0.00385201	0.00556457		0.0101904	0.00955708		0.0137216	0.0112508
0.00318182	0.005136		0.0126655	0.0108693		0.0133406	0.0108533
G- VO2
	WT										KO
BM	17.1	16.4	18.7	16.5	16.5	17.8					16.3	15	16.6	13.4	16.3	16.6	17.4
VO2	48.4023	51.2462	52.0785	47.8491	48.0592	44.8895					54.9419	46.0184	51.1588	46.3411	51.8495	50.3961	54.8448
H- Food intake
	WT										KO
Light cycle	0.0182558	0.0161628	0.0281395	0.0103488	0.0116279	0.0138372	0.0206977	0.0190698	0.0181395		0.0133721	0.0139535	0.0172093	0.0104651	0.0159302	0.022093	0.019186
Dark cycle	0.0380488	0.0287805	0.0406098	0.0312195	0.04	0.0304878	0.0446341	0.0258537	0.0365854		0.0414634	0.0292683	0.0353658	0.035	0.0323171	0.0365854	0.0354878
I- Locomotor activity
	WT										KO
Light cycle	535.965	573.419	524.221	677.43	392.465	664.093	584.512	434.674			530.477	390.965	787.012	606.802	467.523	628.93
Dark cycle	1669.56	3611.27	2344.95	1737.87	2624.07	2525.66	2583.1	2228.56			1815.82	1620.05	2087.98	1365.89	1508.54	2400.02
