# Supplementary material for: OPA1 deletion in brown adipose tissue improves thermoregulation and systemic metabolism via FGF21
Source: eLife. 2021 May 4;10:e66519. doi: 10.7554/eLife.66519 (PMC8128440; doi:10.7554/eLife.66519)
Supplement: Figure 1—source data 1. [file elife-66519-fig1-data1.xlsx]

## Sheet: Sheet1
Figure 1:
A- OPA1 mRNA			B- OPA1 immunoblot			C- OPA1 mRNA
Cont	HFD		Cont	HFD		30C	4C
0.746785	1.71288		0.286701	0.469841		1.16244	2.01856
0.69088	1.5102		0.195332	0.48227		0.969913	3.86648
0.735069	1.46582		0.337209	0.404358		0.886942	5.08036
0.795885	0.906801		0.331818	0.380835		1.6007	1.83598
1.483	1.79404		0.383562	0.384491
1.11178	1.22119			0.335548
	1.51069
	1.4442
D- OPA1 immunoblot					E-OPA1 mRNA
30C	4C	30C	4C		WT	KO
5.40741	3.94133	0.548837	0.219868		1.02536	0.132852
5.00962	3.39216	0.787736	0.291946		1.01621	0.140722
5.1201	3.17647	0.704545	0.424324		1.0159	0.204787
Total levels		Long/short isoform			1.03794	0.184378
					0.910153	0.114353
					0.695224	0.265024
F- OPA1 and UCP1 immunoblot					H- Pyruvate-malate
					State 2			State 3
OPA1		UCP1
WT	KO	WT	KO		WT	KO		WT	KO		WT	KO
0.0927152	0.0135278	38.6207	25.0311		284.188	211.204		240.93	209.762		38.6207	25.0311
0.121739	0.0287857	18.7671	26.1874		245.011	170.034		362.921	134.102		18.7671	26.1874
0.119415	0.0182136	31.0793	18.5366		291.594	199.978		210.413	190.917		31.0793	18.5366
0.129703	0.0119307				264.921	151.968		218.218	200.525
	0.0138129				209.878	213.231		235.712	120.891
	0.0195909
I- PC-malate
State 2			State 3
WT	KO		WT	KO
112.642	98.5293		230.536	108.69
112.776	85.9358		189.511	118.992
101.316	95.2891		191.369	129.497
104.82	91.1236		136.666	72.2623
97.0625	91.0696		126.77
J- ATP			K- Body Mass					L- Body composition 8 weeks
			8 weeks		20 weeks			Fat mass		Lean mass
WT	KO		WT	KO	WT	KO		WT	KO	WT	KO
2682.69	3276.06		20.94	20.61	37.75	24.02		1.3	0.7	14.7	14.6
3666.4	1752.94		26.16	19.32	36.67	22.51		0.8	0.8	19.4	14
3492.96	3086.8		24.26	20.64	41.3	22.01		0.1	0.7	18.5	14.9
5963.18	3338.46		21.89	20.34	33.1	23.57		0.4	0.9	16.2	14.7
6191.62	621.588		22.74	20.99	35.74	24.48		1.1	0.2	16.5	15.8
5564.18				19.68	42.77				0.8		13.8
				20.04	36.64				0.5		14.8
				18.98					1		13.2
M- Body composition 20 weeks					N- BAT mass
Fat mass		Lean mass			8 weeks		20 weeks
WT	KO	WT	KO		WT	KO	WT	KO
12.4009	1.70062	19.9018	16.7996		0.00279386	0.0044058	0.00345669	0.00182787
11.5987	1.49917	19.5011	15.7998		0.00248707	0.00460664	0.00266667	0.00291556
13.2986	1.50108	21.4017	15.2992		0.00325	0.003	0.00408717	0.0018009
3.70058	1.89974	22.6007	16.1007		0.00299559	0.0035907	0.00358209	0.00125957
9.0994	1.40026	20.8007	17.0993		0.00211364	0.002864	0.00529972	0.00240329
14.9011		21.8982			0.00208155	0.004681	0.00410312
7.10083		23.1015			0.00241202	0.005554
					0.00225
					0.003014
					0.002942
O- iWAT Mass					P- gWAT mass
8 weeks		20 weeks			8 weeks		20 weeks
WT	KO	WT	KO		WT	KO	WT	KO
0.0118947	0.00815459	0.0275643	0.00772541		0.0118289	0.00770048	0.0410394	0.0145984
0.0112543	0.0108578	0.0258076	0.00834667		0.0110345	0.0119147	0.0372195	0.0133644
0.0150081	0.00751982	0.0232106	0.00973756		0.0183669	0.00837885	0.0389782	0.0134163
0.0107401	0.0097907	0.00879104	0.00884681		0.0154846	0.00983721	0.0211672	0.00928085
0.0111318	0.006997	0.0188263	0.00779012		0.0147091	0.004694	0.0454314	0.010107
0.0092103	0.009745	0.0308969			0.0106223	0.003635	0.0486907
0.00930043	0.010901				0.0111674	0.005009
0.00958929					0.0103884
0.01234					0.008993
0.011109					0.011164
Q- VO2					R- Core body temperature
					Light cycle		Dark cycle
BW	WT	BW	KO		WT	KO	WT	KO
28.5	50.7966	17.3	40.6391		35.9628	36.9012	37.1366	37.3451
28.8	55.1421	23	50.3219		36.593	36.9081	37.4634	37.7305
26	49.1772	22.3	55.1789		36.6616	36.9442	37.1988	37.5024
28.6	51.0901	19.1	39.5939		36.3035	36.7465	37.3732	38.1354
27.6	55.8999	25.1	51.8466		36.4791	37.193	37.0902	37.3207
					35.9849	36.6407	37.2476	38.2183
