# Supplementary material for: OPA1 deletion in brown adipose tissue improves thermoregulation and systemic metabolism via FGF21
Source: eLife. 2021 May 4;10:e66519. doi: 10.7554/eLife.66519 (PMC8128440; doi:10.7554/eLife.66519)
Supplement: Figure 2—source data 1. [file elife-66519-fig2-data1.xlsx]

## Sheet: Sheet1
Figure 2
A- Rectal Temperature
Time	WT
0	36	37	36	37	37
1	36	35	36	37	36
2	35	35	35	36	34
3	34	34	32	35	34
4	34	33	33	35	35
Time	KO
0	37	36	37	38	37	37	36
1	37	37	37	37	37	36	36
2	36	35	35	36	36	36	36
3	35	35	35	36	35	36	35
4	36	34	36	36	36	36	36
B- mRNA UCP1					C- mRNA Prdm16					D- mRNA Pgc1a
30C		4C			30C		4C			30C		4C
WT	KO	WT	KO		WT	KO	WT	KO		WT	KO	WT	KO
0.31026	0.841178	41.9002	19.6812		0.960248	0.718246	2.5148	2.12484		1.04639	0.436287	5.66573	2.70359
1.11543	0.287463	56.3919	6.81899		1.0414	0.172556	3.29921	0.92903		0.955664	0.142327	9.18467	2.34866
0.346621	0.716401	22.4863	11.7803		1.21544	0.22277	4.23639	1.06354		0.213982	0.388653	15.5889	1.14215
												7.2487
E- Core body temperature					F- VO2					G- Locomotor activity					H- Food intake
Light cycle		Dark cycle			BW	WT	BW	KO		Light cycle		Dark cycle			Light cycle		Dark cycle
WT	KO	WT	KO		28.5	104.808	23	85.5112		WT	KO	WT	KO		WT	KO	WT	KO
36.1221	37.3023	36.6549	37.5085		30.3	103.912	25.1	100.855		364.547	403.372	640.939	538.878		0.0405814	0.0487209	0.0830488	0.0706098
36.2256	36.8488	36.75	37.0463		30.2	106.19	22.3	70.2388		415.547	421.233	696.976	509.854		0.052907	0.0612791	0.100732	0.0693903
37.343	37.2349	36.4915	37.3756							415.442	466.372	609.122	582.659		0.0432558	0.047907	0.104512	0.0536585
