# Supplementary material for: OPA1 deletion in brown adipose tissue improves thermoregulation and systemic metabolism via FGF21
Source: eLife. 2021 May 4;10:e66519. doi: 10.7554/eLife.66519 (PMC8128440; doi:10.7554/eLife.66519)
Supplement: Figure 3—figure supplement 1—source data 1. [file elife-66519-fig3-figsupp1-data1.xlsx]

## Sheet: Sheet1
Figure 3-Supplemental Figure 1
A- Cre mRNA expression
	WT						KO
BAT	0.990597	0.801233	2.3443	0.889626	0.604633		258.785	564.435	1220.54	2397.24	1108.66	1242.01	1065.29
iWAT	1.4645	0.481911	0.46127	0.144708			9.51141	5.14058	0.623477	2.86384	4.13268	1.99481
B- Fast serum FGF21			C- Liver FGF21 mRNA
WT	KO		WT	KO
254.559	724.223		1.36496	0.145405
227.128	639.235		0.75263	0.28048
230.148	558.225		0.869065	0.091254
317.697	451.267		1.01334	0.332455
295.116	365.093			0.736611
	396.38
	393.365
