# Supplementary material for: OPA1 deletion in brown adipose tissue improves thermoregulation and systemic metabolism via FGF21
Source: eLife. 2021 May 4;10:e66519. doi: 10.7554/eLife.66519 (PMC8128440; doi:10.7554/eLife.66519)
Supplement: Figure 3—source data 1. [file elife-66519-fig3-data1.xlsx]

## Sheet: Sheet1
Figure 3
A- UCP1 and OPA1 immunoblots					D- Thermogenic genes
UCP1		OPA1			Genes	WT					KO
WT	KO	WT	KO		Ucp1	0.223844	2.11788	0.446967	1.21131		4.83962	1.26928	3.98381	7.69115
0.014031	0.330435	0.0476744	0.0950311		Prdm16	1.12162	1.16423	0.48509	1.22905		1.71362	1.52608	1.64027
5.39216e-05	0.277622	0.0561765	0.115385		Dio2	1.10506	0.521887	1.17485	1.19821		1.64867	2.41701	1.70479
0.00174346	0.41588	0.078771	0.141631		Fgf21	0.377072	1.24983	1.53865	0.834454		4.65197	3.07491	3.90875	11.6392
0.018583		0.0524971			Ppargc1a	1.53417	1.15698	0.825378	0.483467		1.60373	2.03383	3.13661	2.49119
					Cpt1b	0.736233	1.40491	0.759757	1.0991		0.504416	0.654234	2.25536	3.29569
					Ppara	0.962491	1.18869	0.888326	0.960493		1.95183	2.11149	3.37934	4.7019
E- Pyruvate-malate						F- PC-malate
State 2			State 3			State 2			State 3
WT	KO		WT	KO		WT	KO		WT	KO
67.196	101.276		76.42	174.468		29.151	77.0228		60.8416	101.764
44.276	175.712		41.732	181.768		52.9801	76.7627		79.5909	92.7357
60.844	163.276		152.696	146.48		11.6455	95.649		79.0215	104.522
54.78	96.64		163	186
18.9	83.77		80.56	198
																								New analysis removing highlighted animals
G- Tyrosine hydroxylase immunoblot			H- SNA recording				I- Batokines														J- Serum FGF21			J- Serum FGF21
							Genes	WT							KO						WT	KO		WT	KO
WT	KO		WT	KO			Fgf21	0.312092	0.376084	0.288454	0.708243	1.76941			10.6052	37.5173	10.9516	43.7319	27.3169		103.551	111.282		103.551	111.282
0.00600858	0.020487		11.29	16.72			Slit2-c	2.81597	0.822528	1.24557	1.84964	1.26796			1.93064	2.36608	0.559986	0.904859	0.923541		92.2845	189.583		92.2845	189.583
0.019056	0.034		15.12	16.59			Bmp8b	0.506507	0.758503	0.475795	0.379365	1.36275			5.71366	4.83837	8.53245	9.62479	5.38972		96.9465	100.872		96.9465	100.872
0.012657	0.0277729		11.72	16.46			Metrnl	0.637428	0.805568	0.576485	0.90097	1.06041			1.30424	1.19122	1.28602	2.00884	0.901872		100.272	261.008		100.272	261.008
0.0158469	0.0410169		10.13	11.38			Nrg4	0.968653	0.718023	0.672084	1.01824	1.6986	1.23689		0.652108	0.468508	0.538113	0.638821	0.325112		56.852	101.472		56.852	101.472
0.0143963	0.0201128			22.1			Il6	1.04029	1.46998	0.640396	2.06362	2.11263			1.04334	2.16076	2.5914	4.35722	1.55625		100.232	106.996		100.232	106.996
				16.57																	63.928	189.583		63.928	189.583
																					103.551	100.872		103.551	100.872
L- OPA1 immunoblots adipocytes				M- Secreted FGF21 adipocytes																	92.2845	111.282		92.2845	111.282
WT	KO			WT	KO																96.9465	261.008		96.9465	261.008
0.627219	0.196154			63.588	90.16																100.272	101.472		100.272	101.472
0.575342	0.215741			57.09	62.504																56.852	106.996		56.852	106.996
0.481982	0.194951			46.012	70.796																100.232			100.232
0.638298	0.334419			45.426	72.974																63.928			63.928
0.60199				48.36	99.948
0.677291
