# Supplementary material for: OPA1 deletion in brown adipose tissue improves thermoregulation and systemic metabolism via FGF21
Source: eLife. 2021 May 4;10:e66519. doi: 10.7554/eLife.66519 (PMC8128440; doi:10.7554/eLife.66519)
Supplement: Figure 4—figure supplement 1—source data 1. [file elife-66519-fig4-figsupp1-data1.xlsx]

## Sheet: Sheet1
Figure 4-Supplemental Figure 1
A- Respiration Pyruvate-malate
	WT					DKO
State 2	237.828	249.018	217.33	221.806		122.982	189.563	121.713	103.87
State 3	269.693	278.203	268.469	225.406		119.576	228.697	131.794	99.6362
B- Respiration PC-malate
	WT					DKO
State 2	120.045	114.341	121.907	121.528		92.6283	85.9013	95.2206	107.001
State 3	193.054	183.556	180.241	165.567		159.159	133.069	132.638	147.808
C- mRNA thermogenic genes (BAT)
	WT								DKO
Ucp1	1.07566	0.893034	1.21839	0.804885	1.06155				0.050413	0.993962	0.257841	0.191613	0.378458
Prdm16	3.31592	1.34041	0.848985	1.20213					0.134552	0.290233	0.534704	0.399047	0.729854
Evlov6	0.727951	0.711801	0.952763	1.78921	1.01307	1.11751			0.093184	0.09146	0.43356	0.434117	0.379396
Cpt1β	0.677126	0.65701	1.31222	1.29849	1.12902	1.16845			0.387251	0.671525	0.836191	0.466559
Pgc1α	0.373629	2.13655	0.411423	1.09639	0.543045				1.01289	0.263291	1.43937	0.310695	0.625976
Fgf21	1.0514	2.71964	3.25118						0.296532	0.629926	0.89151
D- Locomotor activity 30C
	WT									DKO
Light cycle	408.453	462.105	237.547	352.953	393.326	350.128	478.814	430.779		304.43	385.128	315.093	407.663	302.802	443.849	436.5	466.523
Dark cycle	1311.07	2049.91	759.329	1615.24	983.11	935.232	1050.23	970.098		726.159	861.854	1195	1058.41	775.476	1379.93	1324.61	1398.95
E- Food intake 30C
	WT
Light cycle	0.0272093	0.0115116	0.0163953	0.0255814	0.0369767	0.0238372	0.0186047	0.0317442		0.0287209	0.019186	0.0146512	0.0183721	0.0194186	0.0205814	0.0203488
Dark cycle	0.0536585	0.054878	0.0285366	0.0463415	0.0482927	0.0513415	0.0256098	0.0429268		0.042561	0.0428049	0.0404878	0.0436585	0.0446341	0.0367073	0.0378049
F- VO2 4C
	WT								DKO
VO2	123.98	104.395	113.79	75.0186	122.164	115.995	97.3198		89.6491	111.888	106.618	102.684
Body mass	24.72	25.61	30.05	29.18	28.74	25.75	27.75		29.36	27.7	24.72	23.52
G- Locomotor activity 4C
	WT								DKO
Light cycle	420.477	581.302	449.209	480.012	531.093	438.058	349.36		456.25	307.273	459.186	497.314	451.547	500.151	378.977
Dark cycle	416.549	833.634	477.512	603.476	556.659	436.293	412.61		524.085	340.622	530.524	548.354	513.171
H- Food intake 4C
	WT								DKO
Light cycle	0.0747674	0.0776747	0.0562791	0.0604651	0.0310465	0.0938372	0.0544186		0.00883721	0.049186	0.0406977
Dark cycle	0.0782927	0.0919515	0.0947561	0.0865854	0.0710976	0.0681708	0.0581707		0.0120732	0.0570732	0.0368293
