# Supplementary material for: OPA1 deletion in brown adipose tissue improves thermoregulation and systemic metabolism via FGF21
Source: eLife. 2021 May 4;10:e66519. doi: 10.7554/eLife.66519 (PMC8128440; doi:10.7554/eLife.66519)
Supplement: Figure 4—source data 1. [file elife-66519-fig4-data1.xlsx]

## Sheet: Sheet1
Figure 4
A- OPA1 and FGF21 mRNA					B- Serum FGF21			C- Body mass			D- Fat mass
OPA1		FGF21
WT	DKO	WT	DKO		WT	DKO		WT	DKO		WT	DKO
1.09533	0.062639	1.0514	0.296532		30.452	145.622		25.75	22.61		5.83	5.75
0.520829	0.049558	2.08781	0.629926		86.946	33.606		27.75	23.52		9.37	6.38
1.35969	0.152421	2.71964	0.89151		42.352	37.296		25.61	24.75		7.03	6.06
0.949543	0.411497	3.25118	0.432176		70.23	106.134		24.72	24.94		4.85	8.02
1.03149	0.054705				29.728	45.508		29.65	27.87		6.75	1.08
1.31625	0.093532				105.212	29.584		29.18	28.6		4.8	5.59
								30.05	27.7		4.66	4.69
									29.36			3.75
									29.96			7.01
									28.19			2.84
E- Lean mass			F- BAT mass			G- iWAT mass			H- gWAT mass
			WT	DKO		WT	DKO		WT	DKO
WT	DKO		0.00259279	0.00404159		0.0071704	0.00932753		0.0054538	0.00314689
71.46	71.21		0.00305983	0.003225		0.00715187	0.0114235		0.0042815	0.00719544
69.55	71		0.00236191	0.00357843		0.00785378	0.00596218		0.00610082	0.00932268
73.8	69.9		0.0029934	0.00400709		0.00973698	0.00966231		0.0070384	0.00862745
74.03	68.97		0.0025858	0.005184		0.0098275	0.0116768		0.00789447	0.00997467
73.52	77.86		0.00217257	0.00288557		0.0141843	0.00917333		0.0107428	0.00830933
74.71	73.43		0.00257485	0.00356931		0.0107743	0.0113184		0.0127478	0.0132637
73.21	74.01		0.00304023	0.00268421		0.0097485	0.00905941		0.00503593	0.010005
	71.87			0.00332512		0.0106552	0.00907656		0.00716092	0.00903828
	69.76			0.00352427			0.00961084			0.00895074
	76.98			0.00319672			0.00680097			0.00738835
				0.00372727			0.00872678			0.0090929
				0.00374843			0.0108182			0.00478788
							0.00961635			0.00478616
I- Core body temperature		30C			J- VO2 30C					K- Core body temperature		4C			L- Core body temperature 4C
Light cycle		Dark cycle			BW	WT	BW	DKO		Light cycle		Dark cycle			Last temperature recorded
WT	DKO	WT	DKO		24.72	61.626	24.72	53.2777		WT	DKO	WT	DKO		WT	DKO
36.6721	36.6767	37.5354	37.5134		25.61	49.39	23.52	52.1059		36.336	31.905	36.3134	36.2098		36.5	36.2
36.507	36.386	37.8561	37.2049		29.65	61.8881	22.61	50.7826		36.4047	36.3942	36.2463	32.5695		36.7	26.4
36.1628	36.9163	37.4317	37.7549		30.05	62.2651	24.94	52.4158		36.25	35.9105	36.0134	34.1207		36.2	27.1
36.4326	36.6174	37.2317	37.4561		29.18	64.2969	29.36	56.1215		36.3128	36.4244	36.4171	36.1976		36.1	36.2
36.7163	36.8198	37.372	37.272		27.75	51.0621	29.96	56.5702		36.0477	36.3988	35.9573	35.9805		35.8	24.5
36.2023	36.5326	36.8695	37.3463		28.74	63.8697	27.7	58.7231			35.7756				35.3	27.5
36.5512		37.1841			25.75	52.289									37	23.7
36.5872		37.3256
N- Immunoblot for UCP1 and OPA1									P- iWAT Immunoblot TH
	WT				DKO				WT	DKO
OPA1	0.988174	0.51167	0.812486		0.782835	0.730208	0.770645		0.553309	0.445333
UCP1	0	0	0		0	0	0.00989645		0.433555	1.09353
									0.35452	0.662813
									0.232915	0.814714
									0.486166
									0.327485
									0.233068
Q- mRNA Thermogenic markers														R- Pyruvate-malate					S- Palmitoyl-Carnitine
														State 2		State 3			State 2		State 3
Genes	WT						DKO							WT	DKO	WT	DKO		WT	DKO	WT	DKO
Ucp1	0.781425	1.54949	0.669081				2.0944	2.19532	3.74297					22.3046	46.2003	33.0216	43.2197		35.6229	92.3512	35.8152	150.901
Prdm16	1.58427	1.64372	0.64613	0.125887			0.724697	0.494856	0.542876	0.390128	0.281079			21.9101	64.4044	36.1498	82.1622		71.9299	46.2003	85.3539	43.2197
Evlov6	1.80996	0.785352	0.404683				0.798412	0.938083	0.957619	0.984766				19.9975	27.2863	25.1063	27.433		20.323	64.4044	30.4786	82.1622
Cpt1β	2.18385	0.797127	0.647047	0.971799	0.400181		0.79906	0.746764	0.904274	0.711299	0.413372	0.942045		48.614	28.7936	33.4496	34.3162		21.2565	27.2863	27.9624	27.433
Ppargc1α	1.57005	1.17673	0.762655	0.490568			0.869915	0.796054	0.937354	0.27341	0.234956			26.0836		39.0726			21.6161	28.7936	31.4838	34.3162
Fgf21	0.35946	1.67918	0.961364				1.38272	0.432572	0.452938	0.167749	0.303079			23.0176		30.0379
														20.4548		24.5948
														39.9523		32.5277
