# Supplementary material for: OPA1 deletion in brown adipose tissue improves thermoregulation and systemic metabolism via FGF21
Source: eLife. 2021 May 4;10:e66519. doi: 10.7554/eLife.66519 (PMC8128440; doi:10.7554/eLife.66519)
Supplement: Figure 5—figure supplement 1—source data 1. [file elife-66519-fig5-figsupp1-data1.xlsx]

## Sheet: Sheet1
Figure 5-Supplemental Figure 1
A- Liver mass
	WT							KO
Control	0.0480375	0.0477554	0.0484072	0.0440764	0.0421024	0.0467084		0.0411142	0.0472327	0.042766	0.0434643	0.0422621
HFD	0.0565709	0.0483845	0.0531496	0.0521975	0.0616049	0.047328		0.0427313	0.0429211	0.0384524	0.0352209	0.0293427
B- Liver triglycerides
	WT									KO
Control	0.370782	0.268768	0.272692	0.486529	0.33547	0.179833				0.259613	0.230186	0.174601
HFD	1.50275	1.43997	1.75124	1.28433	1.00902	1.30853	1.59757	1.07965		0.212529	0.320429	0.199451	0.945592	0.265498
C- Serum triglycerides
	WT								KO
Control	0.879256	0.761649	1.12567	0.952061	1.03047	0.750448			0.632841	0.77845	0.680444
HFD	1.10327	1.30208	1.32168	1.07807	1.02487	1.00246	1.13127		0.560036	0.548835	0.702845	0.862455
D- UCP1 mRNA BAT									KO
	WT								0.6063	0.300464	0.0892635	0.424509	0.443394	0.570394
Control	0.475561	0.707681	0.836396	1.69896	0.628995				0.148038	0.133269	0.716876	0.919508
HFD	2.11078	1.44621	0.87249	1.90256	1.95931	1.75586	1.79205
D- UCP1 mRNA iWAT
	WT								KO
Control	1.48606	0.295007	5.3207	0.816645					1.9666	4.18185	11.9918
HFD	0.322111	0.462367	0.330213	0.46536	1.17572	1.04765			4.52583	14.1648	21.631	22.8977	3.91463
F- Tyrosine hydroxylase iWAT
WT	KO
0.020598	0.00794212
0.0238276	0.010582
0.0166438	0.00850394
	0.013125
