# Supplementary material for: OPA1 deletion in brown adipose tissue improves thermoregulation and systemic metabolism via FGF21
Source: eLife. 2021 May 4;10:e66519. doi: 10.7554/eLife.66519 (PMC8128440; doi:10.7554/eLife.66519)
Supplement: Figure 5—source data 1. [file elife-66519-fig5-data1.xlsx]

## Sheet: Sheet1
Figure 5
A- Body mass					B- Fat mass					C- Lean mass
WT Cont	WT HFD	KO Cont	KO HFD		WT Cont	WT HFD	KO Cont	KO HFD		WT Cont	WT HFD	KO Cont	KO HFD
26.45	52.17	21.02	24.19		6.81	46.96	7.14	5.37		69.94	44.47	68.51	71.52
27.32	35.15	23	25.47		6.95	24.18	3.48	6.67		71.38	59.74	73.48	71.46
27.51	41.49	22.85	25.18		13.81	38.32	1.75	6.75		66.16	49.41	73.52	70.69
27.2	40.37	22.59	23.01		2.94	30.96	6.64	7.39		74.63	55.49	69.94	69.1
28.64	48.51	22.14	24.8		10.47	47.83	6.32	8.47		67.39	43.7	70.46	70.16
30.12	48.83				13.61	48.33				66.4	42.6
29.2	49.18				18.15	48.6				62.33	43.72
33.57	46.75				26.81	48.56				58.09	42.57
D- BAT mass
	WT									KO
Control	0.00564341	0.00509215	0.00331295	0.00362866	0.00462153	0.00475085	0.00610366	0.0047774		0.00348402	0.00335102	0.00364681	0.00399729	0.00330677
HFD	0.00476117	0.00557769	0.00554134	0.00453846	0.00657837	0.0033284	0.00537358	0.00518087		0.00154105	0.00254887	0.00248413	0.00288372	0.00239113
E- gWAT
	WT									KO
Control	0.0289496	0.0168805	0.0151187	0.00986971	0.0328507	0.0210614	0.0354096	0.0235308		0.0152922	0.00840408	0.00684681	0.0136631	0.0111554
HFD	0.0262524	0.0403287	0.0381988	0.026894	0.028989	0.0520917	0.0480752	0.048817		0.0164216	0.016282	0.0127341	0.0162442	0.0128105
F- iWAT
	WT									KO
Control	0.0207829	0.0157747	0.0116043	0.0104463	0.0209965	0.0164061	0.0138665	0.0161027		0.0113105	0.00915102	0.00771064	0.0111698	0.011753
HFD	0.049732	0.0456175	0.0476791	0.049158	0.0525121	0.0342426	0.0463326	0.0421767		0.0134366	0.0116391	0.0104643	0.0120233	0.00968548
G- VO2	WT					KO
BM Control	27.8	26.2	26.9	26.2		22.7	22.3	20.5
BM HFD	41.3	42.7	43	35.9		25.8	23.7	25.1	25.2
VO2 Control	45.9148	41.6818	49.1614	48.3685		57.695	50.9697	52.6378
VO2 HFD	59.4367	60.9004	64.3538	59.4609		53.4463	47.0414	53.2974	53.9155
H- Food intake
	WT					KO
Control	1.24	2.205	3.07	4.93		3.97	4.11	2.565
HFD	1.55	1.7	1.245	1.705		2.16	1.875	1.355	2.37	2.005
I- Locomotor activity
	WT					KO
Control	679.784	1145.55	1581.7	989.08		754.216	2274.4	911.903
HFD	598.316	1060.21	599.26	487.351		1004.77	1330.75	967.779	1171.1	926.818
J- GTT
	WT Cont									WT HFD									KO Cont						KO HFD
0	145	172	160	160	178	157	121	134		286	235	251	253	309	196	229	217		159	201	173	129	153		213	199	236	173	205
5	338	299	299	309	223	174	213	259		539	331	316	438	434	313	308	318		305	303	163	241	210		334	296	296	351	286
15	249	356	280	359	276	272	310	320		600	466	501	501	560	407	349	333		309	340	276	318	369		335	582	421	340	353
30	222	226	234	252	355	213	234	271		600	420	584	520	600	455	389	448		212	292	230	262	309		383	479	377	288	366
60	211	193	224	200	317	211	183	175		600	517	600	493	600	417	406	367		234	182	198	211	224		258	303	297	256	250
120	216	225	180	177	234	163	148	180		597	378	579	464	515	346	342	300		139	199	134	184	181		183	187	191	163	176
K- AUC GTT
	WT									KO
Control	26980	27643	26888	27185	34840	24275	23715	25650		26018	27755	23210	27015	29033
HFD	70668	52950	66770	57985	66978	47308	44528	42685		32943	40015	35650	30205	31835
J- Fasting glucose
	WT									KO
Control	145	172	160	160	178	157	121	134		159	201	173	129	153
HFD	286	235	251	253	309	196	229	217		213	199	236	173	205
M- ITT
	WT Cont									WT HFD									KO Cont						KO HFD
0	158	165	160	134	174	143	140	148		222	197	212	176	203	210	183	208		150	164	140	150	143		218	228	169	179	168
15	84	74	76	96	86	88	88	59		182	158	176	152	158	145	126	141		82	73	66	85	68		80	97	98	114	74
30	70	72	85	69	83	59	88	65		144	125	136	133	135	102	112	97		54	50	63	62	49		36	77	75	71	71
45	70	74	84	51	69	49	68	53		177	148	133	153	132	109	105	113		39	41	45	42	28		99	75	63	62	66
60	69	76	80	41	61	37	59	42		189	144	132	174	153	89	102	89		37	33	18	48	13		64	77	59	66	66
90	94	123	86	40	68	58	79	53		248	194	151	192	188	92	116	128		33	41	34	60	glucose injected		47	71	56	73	56
120	120	78	163	61	84	71	99	68		216	193	194	209	206	122	140	119		62	62	51	62			37	80	81	141	92
150	131	93	183	68	96	112	138	91		243	220	277	215	234	158	223	203		68	104	61	73			22	114	131	174	134
N- AUC for ITT
	WT									KO
Control	14483	13673	16890	9218	12248	10395	13448	9705		8453	9083	7530	9795	3345
HFD	31028	26093	25740	27060	26670	17708	19838	19283		9150	13418	12210	15563	12360
O- Fasting insulin
	WT								KO
Control	0.53	0.572	0.62	0.56	0.331	0.717			0.343	0.231	0.698
HFD	1.789	2.122	3.584	4.107	1.253	1.198			0.386	0.294	0.308	0.132	0.563
