# Supplementary material for: OPA1 deletion in brown adipose tissue improves thermoregulation and systemic metabolism via FGF21
Source: eLife. 2021 May 4;10:e66519. doi: 10.7554/eLife.66519 (PMC8128440; doi:10.7554/eLife.66519)
Supplement: Figure 6—figure supplement 1—source data 1. [file elife-66519-fig6-figsupp1-data1.xlsx]

## Sheet: Sheet1
Figure 6-Supplemental Figure 1
A- BAT mass
	WT									DKO
Control	0.00386	0.00279819	0.00263194	0.00403145	0.00420563	0.00391594	0.00413531	0.00342901		0.00108929	0.00161589	0.0010875	0.00109831	0.00183972
HFD	0.00298364	0.00316381	0.00302015	0.00298333	0.00333775	0.00292781	0.00310837	0.00232706		0.00134943	0.00173034	0.00128713	0.00141869	0.00184969	0.00174587
B- gWAT mass
	WT										DKO
Control	0.0262469	0.03035	0.0110482	0.0178472	0.0136132	0.0217775	0.0162928	0.0121617	0.0133395		0.0293321	0.0122053	0.01365	0.00702712	0.0118397
HFD	0.0440701	0.0415868	0.0416373	0.0504048	0.0531324	0.0322357	0.0381182	0.0484871			0.0289403	0.0110262	0.0123564	0.0115363	0.0259356	0.0216634
C- iWAT mass
	WT										DKO
Control	0.016213	0.0178175	0.00926807	0.0113125	0.0102453	0.0134755	0.0120783	0.010396	0.00966358		0.0170714	0.00939404	0.00882188	0.00576271	0.00780488
HFD	0.0244089	0.0194005	0.0295905	0.0311148	0.0360276	0.0337192	0.0278918				0.0141136	0.00914607	0.00710231	0.00985121	0.0146043	0.0125281
D- Liver triglycerides
	WT							DKO
Control	1.85984	1.3701	1.2535	1.84235	1.91669	1.29839		1.71292	1.01679	1.21852	1.7514	2.14844
HFD	2.35395	2.13736	2.03329	2.21898	2.24464			1.66978	0.812733	0.893773	1.17013	1.39692
E- UCP1 mRNA BAT
	WT													DKO
Control	0.337907	0.441023	0.553561	0.589082	0.559573	0.389563								0.730366	0.208858	0.305264	0.689199
HFD	0.730498	0.439941	0.821624											0.764153	0.712106	0.868351	0.762417	0.863753
F- UCP1 mRNA iWAT
	WT													DKO
Control	0.584936	0.838067	0.885286	1.29591	0.389563									0.0822994	1.47889	0.233693
HFD	0.368715	7.63462	2.99064	0.21235	2.06094									11.4995	13.4639	8.55731	5.61507	6.40683
G- TH iWAT HFD
WT	DKO
0.275862	0.118846
0.285841	0.167804
0.322314	0.151626
0.223724	0.198241
H- Serum FGF21 DKO
	WT									DKO
Control	422.365	430.831	301.018	208.831	126.051	69.6103	140.161	190.017		133.577	66.7883	106.297	218.238	281.263
HFD	350.874	622.73	1653.72	416.721	617.086	343.348				188.136	321.713	128.873	120.407	200.365	140.161
I- Seum FGF21 KO
	WT									DKO
Control	378.519	375.009	177.204	527.362	427.688					833.478	651.855	527.362	532.472
HFD	1260.2	1668.38	2069.75	713.493	1572.64	838.203	1406.57			481.002	715.29	213.138	277.902	181.446
