# Supplementary material for: OPA1 deletion in brown adipose tissue improves thermoregulation and systemic metabolism via FGF21
Source: eLife. 2021 May 4;10:e66519. doi: 10.7554/eLife.66519 (PMC8128440; doi:10.7554/eLife.66519)
Supplement: Figure 6—source data 1. [file elife-66519-fig6-data1.xlsx]

## Sheet: Sheet1
Figure 6
A- Body mass
	WT									DKO
Control	32.06	30.1	35.09	31.91	30.5	29.4	33.5	35.7		29.38	29.66	30.76	30.91	34.01
HFD	45.19	41.87	40.05	41.56	43.2	42.7	49.2			28.31	25.78	30.06	34.43	32.21	30.4
B- Fat mass
	WT									DKO
Control	7.8	12.96	19.38	4.39	3.93	4.76	7.16	11.2		4.08	0.67	4.55	7.76	16.76
HFD	34.96	33.68	29.46	31.04	37.5	40.05	40.85			4.24	2.72	5.99	17.14	15.52	14.8
C- Lean mass
	WT									DKO
Control	70.18	65.12	61.56	75.52	77.7	74.49	71.34	70.03		76.2	72.17	69.56	63.51	73.52
HFD	52	53.02	56.18	54.86	49.31	47.31	47.15			71.71	74.09	70.86	64.48	64.89	66.12
D- VO2	WT										DKO
BM Control	32.4	31.4	28	29.2	31.2						29.4	29.8	27.9	29.3
BM HFD	37.9	39.1	41.6	40.4	38.8						23.81	27.75	37.3	28.8	32.1
VO2 Control	70.3915	58.6157	59.4792	55.0522	66.5141						63.2103	67.0148	63.7248	63.4479
VO2 HFD	66.7778	69.6869	79.4774	72.0691	70.3687						56.7757	66.3605	72.8974	71.6195	67.7233
E- Food intake
	WT											DKO
Control	2.22	3.54667	2.72667	3.185	2.545	2.97	1.675	2.635				2.68667	3.55333	3.06667	2.82	1.535
HFD	2.31333	2.13333	2.12	2.36667	1.23	2.02	2	0.685	2.32	2.15		1.82	2.74667	1.38	2.54667	2.61333	1.6	1.73	1.68	1.915
F- Locomotor activity
	WT											DKO
Control	1792.59	570.207	498.073	1580.82	1414.21	1954.82	2069.98	1243.77				1220.59	1142.52	1305.17	603.5	1207.06
HFD	648.451	933.073	1143.34	1355.27	1229.61	1582.52	1578.39	1629.54	669.878	950.854		894.415	905.22	818.341	868.183	1041.82	2513.56	1031.91	1627.96	1377.18
G- GTT
	WT Cont										WT HFD									DKO Cont						DKO HFD
0	148	200	164	180	165	152	171	149	125		249	212	195	231	244	272	227	180		186	175	182	166	160		261	178	214	190	203	197
5	246	265	214	294	263	214	297	235	154		330	264	251	338	326	355	292	300		204	310	288	256	200		323	231	336	210	341	326
15	258	260	219	298	272	337	379	297	202		411	333	353	408	449	571	467	493		207	319	279	275	210		377	255	412	280	437	397
30	277	228	192	264	237	315	380	341	178		432	327	501	485	479	600	489	505		225	289	303	232	173		401	366	395	332	411	413
60	153	196	168	204	180	475	327	290	142		473	340	287	465	512	600	471	465		188	207	317	221	155		364	382	274	252	398	334
120	145	185	136	173	176	167	135	137	128		295	251	192	224	256	459	309	225		172	169	163	127	133		212	191	201	140	232	151
H- GTT AUC
	WT										DKO
Control	22908	25238	20713	26690	24498	39670	34708	30680	18228		23265	27638	32075	24748	19383
HFD	48090	36860	36730	46770	50165	64750	50063	47900			39550	36520	35453	28560	42645	36753
I- Fasting glucose
	WT										DKO
Control	148	200	164	180	165	152	171	149	125		186	175	182	166	160
HFD	249	212	195	231	244	272	227	180			261	178	214	190	203	197
J- ITT
	WT Cont								WT HFD							KO Cont						KO HFD
0	117	144	120	164	152	169	154		174	178	194	215	193	190		161	133	123	131	126		178	136	188	100	213	177
15	100	91	87	124	103	123	87		202	181	184	240	176	176		87	104	93	93	83		183	87	92	56	174	129
30	107	89	78	101	77	105	77		138	120	116	144	143	152		99	83	69	70	76		119	78	75	43	111	89
45	78	78	59	77	70	86	70		121	94	112	126	157	147		81	74	52	51	72		96	61	69	42	80	80
60	83	74	73	71	72	77	91		137	98	94	109	151	190		92	81	37	50	76		94	62	61	23	76	80
90	89	86	82	87	133	74	132		181	98	81	136	198	158		103	97	25	37	138		94	62	69	36	91	102
120	133	135	100	166	145	67	168		231	162	110	186	219	182		138	130	37	44	161		98	84	87	38	124	175
150	134	181	132	152	135	72	152		251	199	116	217	221	195		139	152	62	58	126		139	127	129	52	156	150
K- ITT AUC
	WT								DKO
Control	15690	15960	13343	17228	16875	13020	17993		16598	15825	7755	8618	16980
HFD	27428	20250	17220	24630	27810	25950			17265	12090	12938	6383	17573	18158
