# Supplementary material for: OPA1 deletion in brown adipose tissue improves thermoregulation and systemic metabolism via FGF21
Source: eLife. 2021 May 4;10:e66519. doi: 10.7554/eLife.66519 (PMC8128440; doi:10.7554/eLife.66519)
Supplement: Figure 7—source data 1. [file elife-66519-fig7-data1.xlsx]

## Sheet: Sheet1
Figure 7
A- Immunoblot peIf2a/eif2a			B- mRNA ER stress markers															C- ATF4 mRNA BAT (DKO)			D- OPA! mRNA BAT (DKO)
WT	KO			WT							KO							WT	DKO		WT	DKO
0.01105	0.028777		Atf4	0.914809	1.10243	0.639051	0.764077	0.796856			1.83449	2.57064	0.989413	3.31383	2.28384			2.26637	0.132914		1.84549	0.17711
0.017045	0.018357		Chop	0.693052	1.11052	0.930548	1.02455	0.637472			4.51727	6.2406	1.87472	11.3137	5.17145			1.19658	0.212808		1.07654	0.158118
0.014645	0.032742		Ire1α	0.962759	0.930645	1.02537	1.36824	0.934677	0.851128		3.45123	5.76861	1.40562	7.49007	3.41767	3.07068		0.78271	0.344243		1.34512	0.331264
																		0.9679	0.405421		1.32377	0.379506
E-FGF21 (BAT) mRNA			F- Serum FGF21			G- Body mass			H- BAT mass			I- gWAT mass			J- iWAT mass			1.52403	0.25862		1.142	0.330509
WT	DKO		WT	DKO		WT	DKO		WT	DKO		WT	DKO		WT	DKO		2.14374	0.30319		1.96132	0.446177
0.0242102	1.02509		0.0242102	1.02509		22.05	23.45		0.00311817	0.00341566		0.0108783	0.00965051		0.00803175	0.0100186		1.17637	0.10767		0.807154
0.569277	0.18111		18.5038	100.93		21.5	22.95		0.00176707	0.0032784		0.00883534	0.0174718		0.00566265	0.0110581		1.28704			1.66975
0.7407	0.160627		23.5502	68.9686		24.9	22.05		0.00290219	0.00350763		0.0160558	0.00753817		0.0118556	0.00818321		1.35643			1.09641
0.958655			18.5038	94.0691		22.9	24.81		0.00194466	0.00341566		0.00747826	0.00965051		0.00735968	0.0100186		4.28694			1.6135
0.716393			65.6113	41.9852		24.77	23.31		0.00205333	0.0032784		0.00465778	0.0174718		0.00783111	0.0110581		2.161			1.69221
0.135996				94.0691		22.3	24.35		0.00137264	0.00350763		0.00574528	0.00753817		0.00650943	0.00818321					1.51601
0.0526559				62.607		22.2	21.48		0.00194466			0.00747826			0.00735968
									0.00311817			0.0108783			0.00803175
									0.00176707			0.00883534			0.00566265
									0.00290219			0.0160558			0.0118556
K- VO2 (30C)
	WT									DKO
BM	21.8	18	21.1	17.36	18	18.2	24.2	22.9		24.56	23	17.5	20	23.27	24.8	17.9
VO2	100.274	82.3795	97.6282	35.7026	90.9418	77.3152	102.719	101.174		98.2679	102.945	85.8563	25.3182	73.1841	103.981	85.6751
L- Temperature (30C)
	WT																		DKO
Light	36.7442	36.7651	36.9477	36.4884	36.5267	36.4337	36.7279	36.8209	37.1291	36.9523	36.7256	37.0163	36.5581						36.6116	36.7012	37.1942	36.9791	36.8186	37.0674	36.764	36.65	37.5174	36.7465
Dark	37.6183	37.7585	38.0122	37.3146	37.0524	36.9671	37.5159	37.8329	37.728	37.5744	37.539	37.5134	37.5341						37.4195	37.4049	37.6037	37.578	37.6793	37.7549	37.6024	37.322	38.1976	37.3781
M- Thermogenic genes (iWAT room temperature)
	WT					DKO
Ucp1	0.00243	0.06193	0.24361	0.00644		0.40126	0.0008	0.00948
Dio2	0.02676	0.39578	0.22437	0.06426		0.4949	0.10719	0.26636
Pgc1α	0.14455	0.91566	0.88704	0.20364		0.86913	0.25959	0.39156
Cpt1β	0.14819	0.348824	0.601378	0.13743		0.506524	0.0360817	0.0644267
N- Core Temperature (4C)
	WT													DKO
Light	36.9302	36.7628	36.8791	36.9279	36.4756	36.8826	36.8849	36.5465	36.9058	36.6849	36.8337	36.7709		37.0081	36.3314	37.0954	36.7988	36.3035	36.9395	36.6209
Dark	36.8829	36.9061	37.0146	37.3085	36.8744	37.5341	37.2171	36.6305	36.539	36.8659	37.2256	36.7902		36.9707	36.35	37.1	36.8915	36.2744	37.0451	36.6317
O- Last Temperature recorded			P- Thermogenic genes BAT (4C)
				WT									DKO
WT	DKO		Ucp1	0.988626	1.27178	0.972991	1.17485	0.979205	1.10506	1.11809	0.895938		0.401539	0.364916	0.387095	0.607996	0.405171	0.636437
36.6	35.2		Prdm16	0.841666	0.839059	0.992203	0.98711	1.03457	0.972401	1.44726			0.503478	0.496343	0.628998	0.575092	0.608334
36.5	36.1		Dio2	0.488003	1.14877	0.612418	0.897599	0.588074	0.806236	0.912518	0.532983		0.231046	0.354959	0.480007	0.518961	0.366661	0.526091
35.7	24.1		Elovl6	1.67005	1.27639	1.57289	1.61294	0.966112	1.31651	1.17987	1.39501		0.229017	0.339936	0.441418	0.438694	0.450078	0.647296
38.9	37.5		Pgc1α	0.905674	0.828573	0.791451	0.9502	1.27812	0.802485	1.19904	1.18772		0.905674	0.828573	0.791451	0.9502	0.508398	0.67222
36.9	28.2		Cpt1β	1.67005	1.27639	1.57289	1.61294	0.966112	1.31651	1.17987	1.39501		0.754751	0.951877	1.02513	1.0239
37.4	25.1
37.5	36.6
37.6	35.9
36.2	36.7
	36.8
Q- Thermogenic genes iWAT (4C)
	WT													DKO
Ucp1	1.03959	0.936099	0.796031	1.09443	1.1795	2.27353	2.03935	2.69047	2.14459	2.66124	1.02815	1.82159		0.342806	0.911362	0.353245	0.647108	1.178	1.12979
Prdm16	1.91118	1.43866	1.86258	1.23664	1.07063	1.38921	1.09055	1.42465	1.00641	1.14887	1.24221			1.03207	1.83109	1.0283	1.29192	0.606956
Dio2	0.794216	1.06891	1.5728	1.79316	1.04718	2.68723	1.01676	2.43204	1.61248	1.4619	2.78812	2.54299		0.744506	1.34921	0.993195	0.865815	1.14293	1.15624
Pgc1α	1.61794	1.57554	1.03906	1.67929	1.00525	0.865532	0.645878	1.47503	1.11078	1.22587	1.33323	1.45543		0.965315	0.820816	1.10759	1.01868	0.931127	0.713388
Cpt1β	1.44157	1.0588	1.14025	1.46896	1.79238									0.703408	1.95575	0.880364	1.45746
Fgf21	0.805932	1.38649	1.56302	2.43646	1.22721	0.864832	1.80715	1.64841	2.20178	1.64995				0.962465	1.33762	0.839457	0.585466	0.933804	1.29708
R- UCP1 immunoblot (iWAT) 4C
WT	DKO
1.32072	0.017197
0.798608	0.012014
0.955273	0.009117
0.950068	0.311431
0.975336
0.587647
1.44718
0.487628
1.12013
0.698837
1.91511
0.743465
