# Supplementary material for: OPA1 deletion in brown adipose tissue improves thermoregulation and systemic metabolism via FGF21
Source: eLife. 2021 May 4;10:e66519. doi: 10.7554/eLife.66519 (PMC8128440; doi:10.7554/eLife.66519)
Supplement: Figure 8—source data 1. [file elife-66519-fig8-data1.xlsx]

## Sheet: Sheet1
Figure 8:
A- Body Mass			B- Fat mass			C- Lean mass
WT	DKO		WT	DKO		WT	DKO
34.1	38.9		31.67	38.56		51.03	48.59
39.07	47.6		26.36	45.8		58.1	42.23
36.08	38.7		24.67	34.11		59.04	50.65
45.84	40.8		36.21	39.22		50.83	48.04
48.08	32.5		48.25	27.69		42.22	56.62
	37.22			31.97			54.54
D- GTT	WT													DKO									E- GTT AUC			F- Fasting glucose
0	253	213	235	208	229	213	235	208	229	284	215	279		343	242	283	294	254	165	165	254		WT	DKO		WT	DKO
5	331	328	421	344	390	328	421	344	390	400	531	461		375	336	338	352	284	364	364	343		52608	60173			343
15	510	455	534	454	469	455	534	454	469	476	546	528		466	417	422	494	482	502	502	376		54438	47675		253	242
30	521	531	600	517	507	531	600	517	507	541	598	592		543	473	485	589	472	524	524	559		64300	52190		213	283
60	531	518	562	543	509	518	562	543	509	563	535	581		590	423	498	566	399	492	492	579		52853	59343		235	294
120	250	350	503	267	336	350	503	267	336	429	295	450		397	322	345	369	263	252	252	432		53753	45255		208	254
																							54438	50908		229	165
																							64300	50908		213	165
G-ITT	WT												DKO					H- ITT AUC		I- Fasting Insulin			52853	59500		235	254
0	231	251	222	216	231	202	231	231	251	222	216		193	194	193	227		WT	KO	WT	DKO		53753			208
15	176	174	135	149	165	196	237	176	174	135	149		113	181	102	122		29123	17235	1.133	1.01605		60038			229
30	159	128	118	111	185	202	207	159	128	118	111		100	153	89	125		26783	34455	5.6385	1.02195		57725			284
45	171	143	107	108	210	203	199	171	143	107	108		99	175	88	106		19485	16943	4.9605	1.488		63720			215
60	178	148	100	102	210	224	211	178	148	100	102		83	220	76	117		19740	24450	1.949	2.9475					279
90	200	175	121	108	208	239	222	200	175	121	108		101	258	103	197		30758		3.143	1.788
120	207	204	125	146	205	241	224	207	204	125	146		128	292	127	208		34320			3.3495
150	239	235	186	179	234	290	267	239	235	186	179		158	261	180	178		33510
																		29123
																		26783
																		19485
																		19740
J- Liver Mass			K- Liver triglycerides
WT	DKO		WT	DKO
0.044422	0.034982		1.27641	0.887111
0.042591	0.037375		2.19239	1.0179
0.039679	0.035041		0.872483	0.839787
0.032898	0.035821		1.21303	1.41685
0.030672	0.034329		0.834624	0.96455
	0.029394			0.875925
				0.935123
