# Supplementary material for: OPA1 deletion in brown adipose tissue improves thermoregulation and systemic metabolism via FGF21
Source: eLife journal article supplement (doi:10.7554/elife.66519), 2021-05-04

**A****Pyruvate-Malate**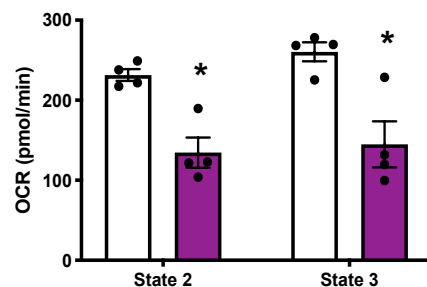**B****Palmitoyl-Carnitine**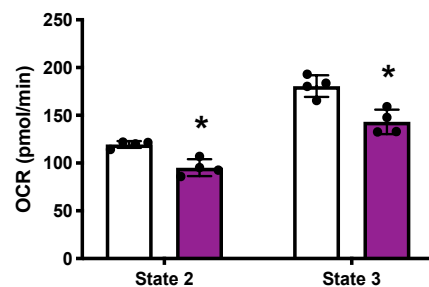**C****Thermogenic markers**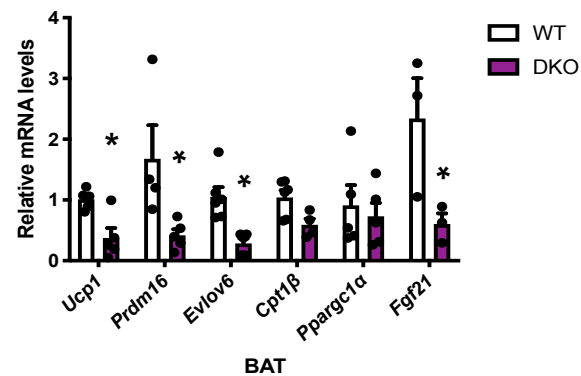**D****Locomotor Activity**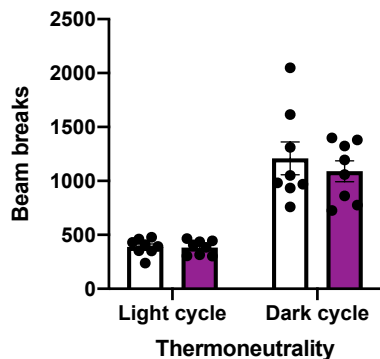**E****Food Intake (average)**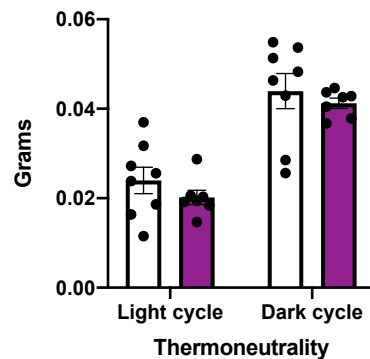**F**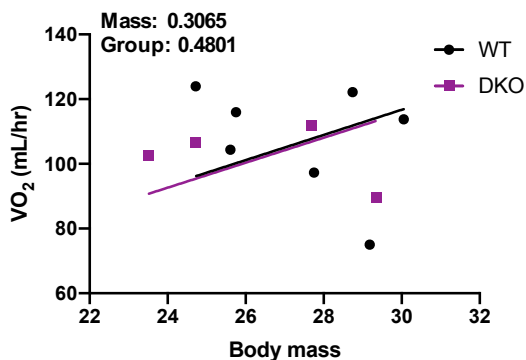**G****Locomotor Activity**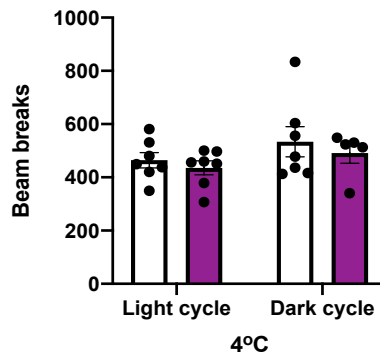**H****Food Intake (average)**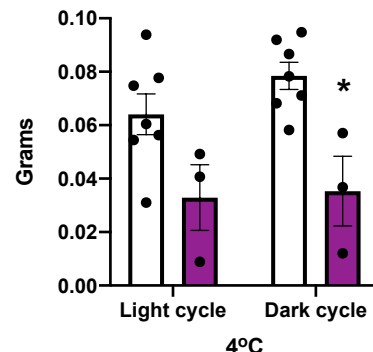

Supplement: supp [file elife-66519-supp-v1.zip]
