# Supplementary figures and images for: OPA1 deletion in brown adipose tissue improves thermoregulation and systemic metabolism via FGF21
Source: eLife journal article supplement (doi:10.7554/elife.66519), 2021-05-04

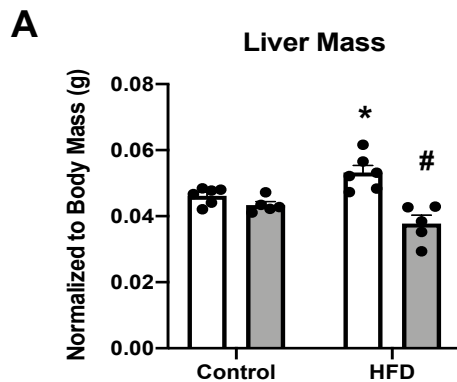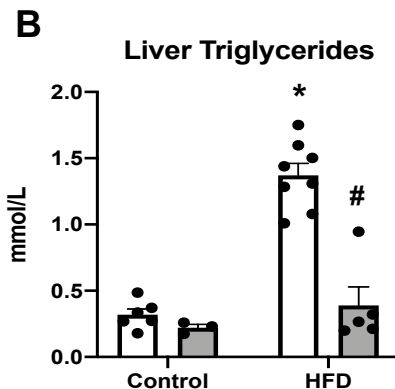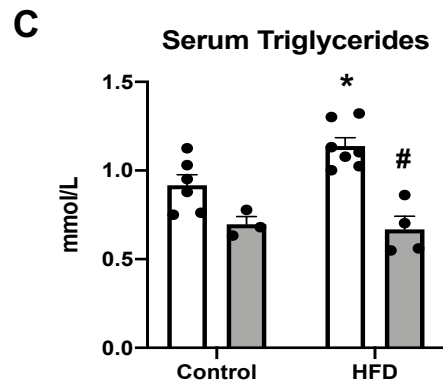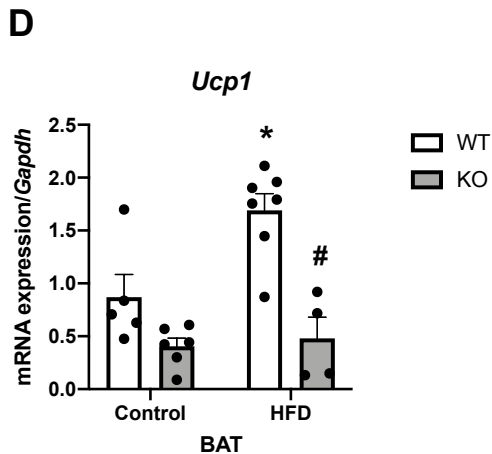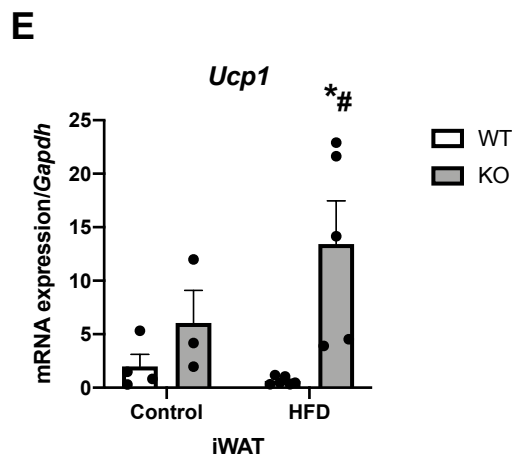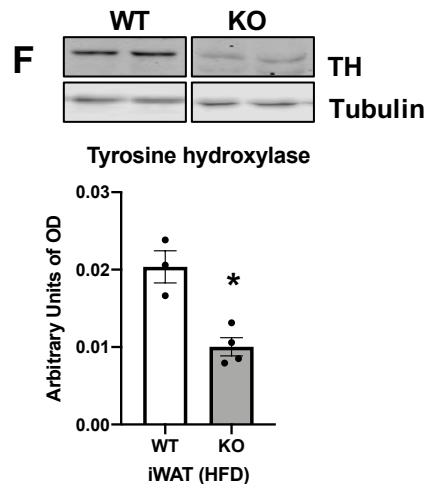

Supplement: supp [file elife-66519-supp-v1.zip]

**A**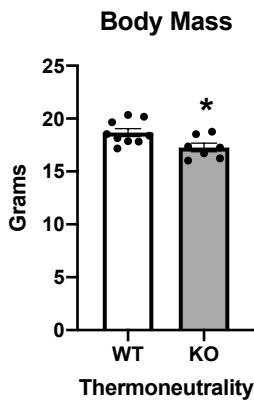**B**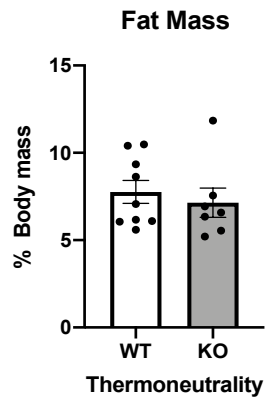**C**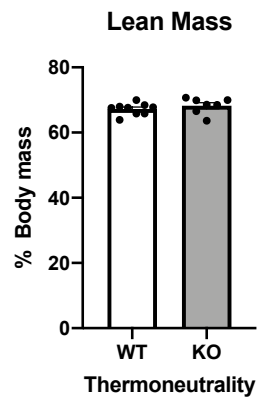**D**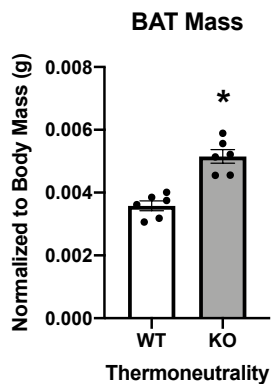**E**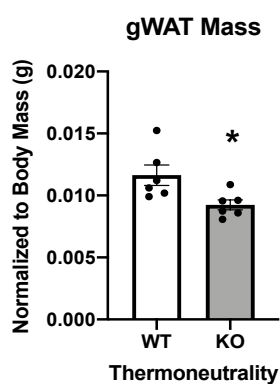**F**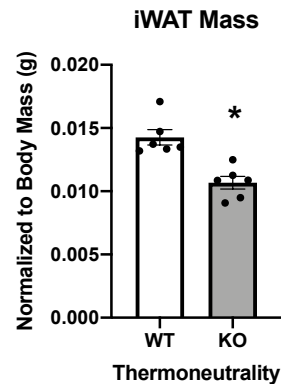**G**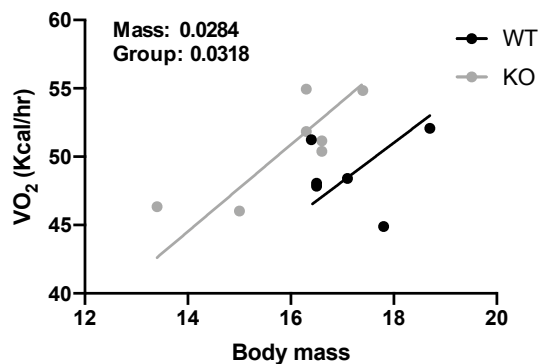**H**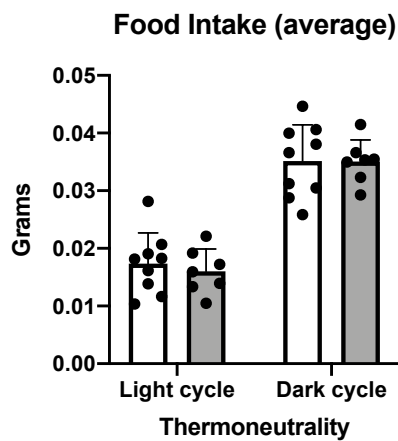**I**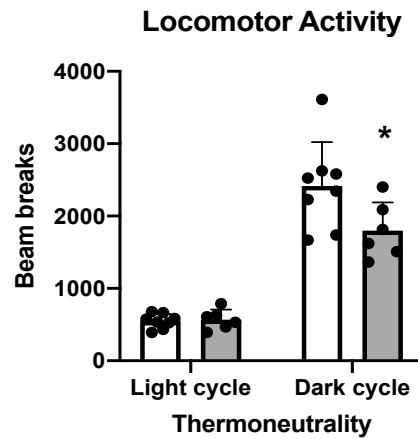

Supplement: supp [file elife-66519-supp-v1.zip]

**A**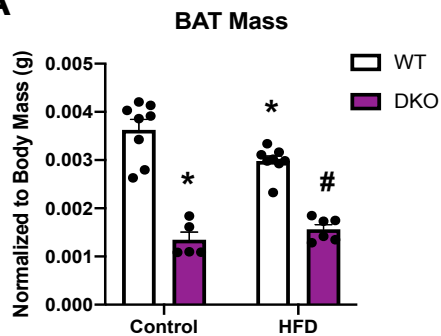**B**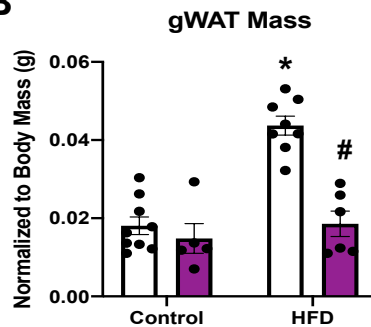**C**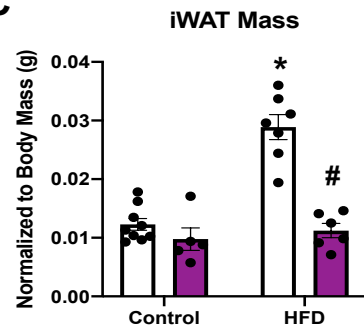**D**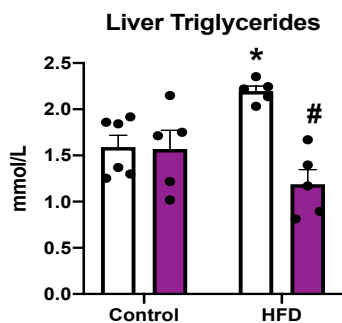**E**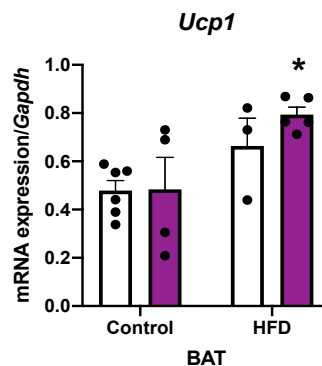**F**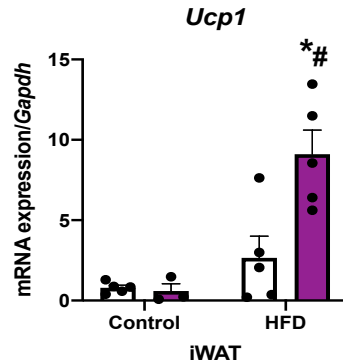**G**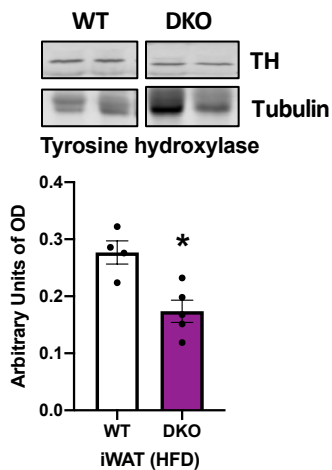**H**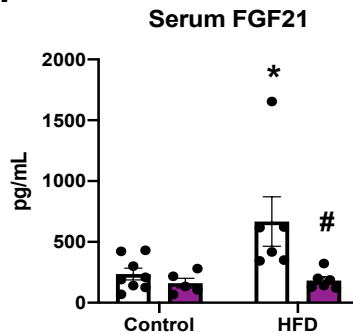**I**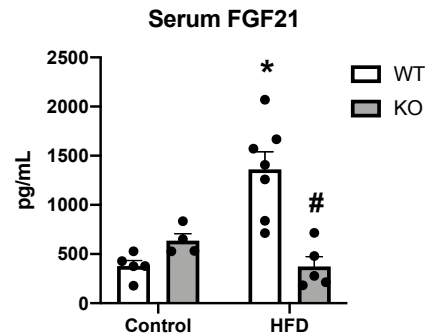

Supplement: supp [file elife-66519-supp-v1.zip]

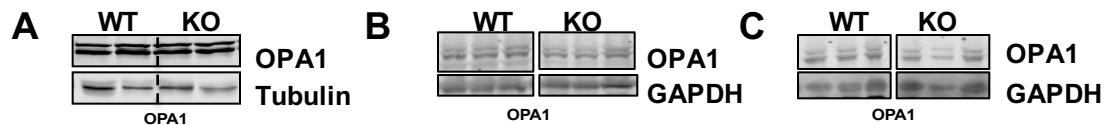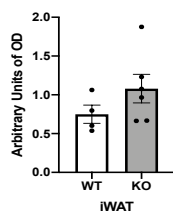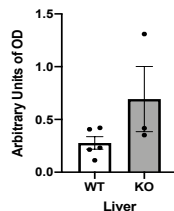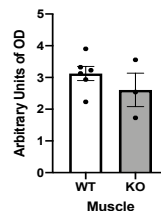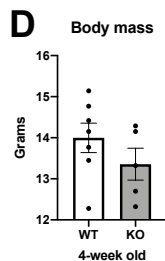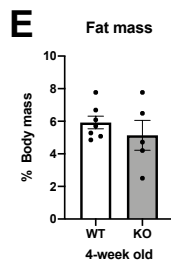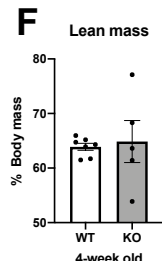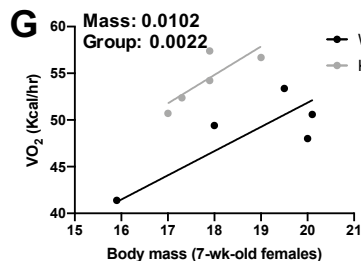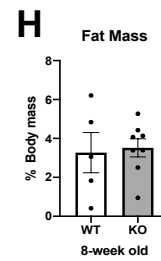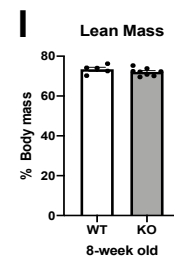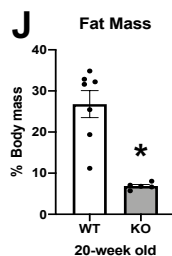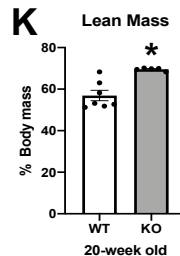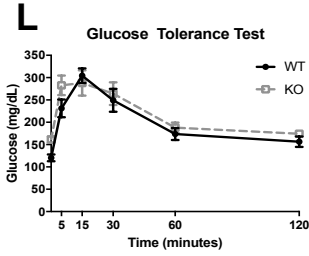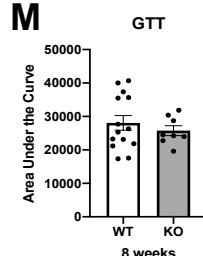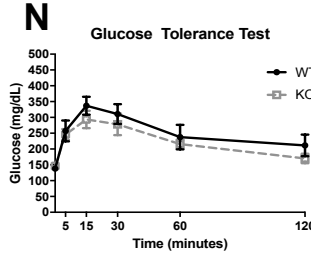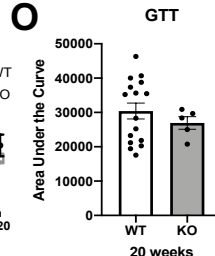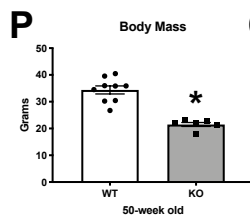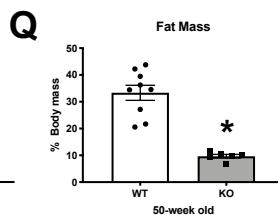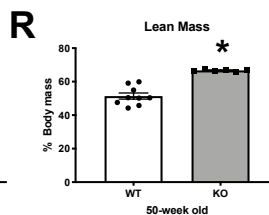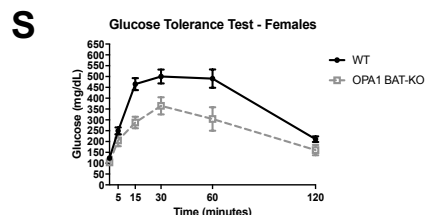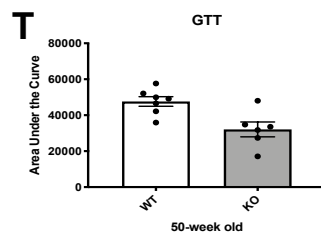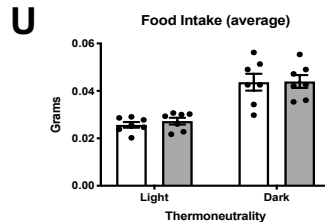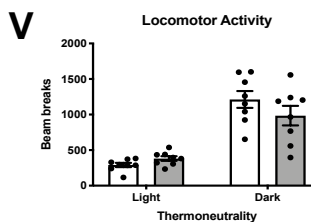

Supplement: supp [file elife-66519-supp-v1.zip]

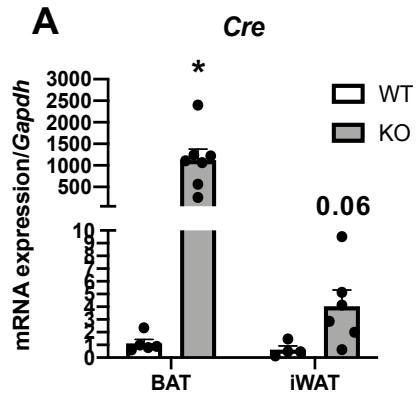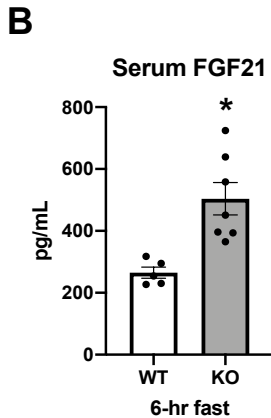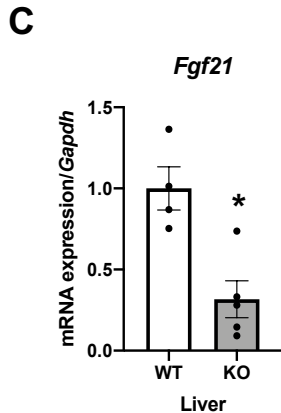

Supplement: supp [file elife-66519-supp-v1.zip]
